# Supplementary material
Source: PubMed Central journal article supplement (PMC2270360)
Supplement: 125_2008_942_MOESM1_ESM.pdf [file 125_2008_942_MOESM1_ESM.pdf]

## **Electronic supplementary material**

Members of the EMQN MODY group are: C. Carette, Department of Immunology and Diabetology, Université René Descartes, AP-HP Hopital Cochin, Paris, France; L. Castano Gonzalez, Endocrinology and Diabetes Research Group, Hospital de Cruces, Bizkaia, Spain; G. de Nanclares Leal, Endocrinology and Diabetes Research Group, Hospital de Cruces, Bizkaia, Spain; R. Elles, National Genetics Reference Laboratory and Regional Molecular Genetics Service, Manchester, UK; G. Gaspar, Instituto Nacional de Saúde Dr Ricardo Jorge, Lisbon, Portugal; D. Gasperikova, Laboratory of Diabetes & DIABGENE, Institute of Experimental Endocrinology SAS, Bratislava, Slovakia; T. Hansen, Steno Diabetes Center, Gentofte, Denmark; M. Herr, Children's Hospital, Vivantes Klinikum im Friedrichshain, Berlin, Germany; O. Kamarainen, European Molecular Genetics Quality Network, Manchester, UK; C. Kannengiesser, Hôpital Bichat-Claude Bernard, Laboratoire de Biochimie, Paris, France; I. Klimes, Laboratory of Diabetes & DIABGENE, Institute of Experimental Endocrinology SAS, Bratislava, Slovakia; G. Lacape, Laboratoire de Biochimie, Groupe Hospitalier Sud, Bordeaux, France; M. Losekoot, Laboratory for Diagnostic Genome Analysis, Leiden University Medical Centre, the Netherlands; M. Malecki, Department of Metabolic Diseases, Jagiellonian University, Medical College, Krakow, Poland; P. Meyer, Institute of Molecular Medicine, Munich, Germany; P. Njolstad, Department of Clinical Medicine, University of Bergen and Department of Pediatrics, Haukeland University Hospital, Bergen, Norway; T. Predragovic, Clinical Institute of Laboratory Diagnosis, Zagreb University Hospital Center, Croatia; S. Pruhova, Department of Paediatrics, Second Faculty of Medicine, Charles University Prague, Czech Republic; W. Wuyts, Department of Medical Genetics, University and University Hospital of Antwerp, Antwerp, Belgium.
